# Supplementary material
Source: Springer Nature journal article supplement (https://www.springermedizin.de/resource/supplementary/12888_2012_1224_MOESM1_ESM.pdf/9480654)
Supplement: MOESM1 [file 9480654]

# Cognitive Assessment

## Indicators of Everyday Functioning

For example:  
**Self care**  
Make a cup of tea  
Washing self  
Domestic duties  
**Money management**  
Use of basics card  
Knowledge of pension

## Cognitive Tasks

For example:  
**Standardised Tests**  
KICA  
Wechsler Scales  
Matrices  
**Informal Tasks**  
Biographical info  
Remember objects  
Sort cards  
Add card values  
Make a judgement

## Contextual Information

For example:  
**Person factors**  
Language  
Education level  
Acculturation  
Medical history  
**Social factors**  
Work  
Poverty  
Substance misuse  
Relationships  
Urban/remote  
Cultural connection  
Basic needs met  
**Historical factors**  
Family substance use  
Complex trauma  
Removal from family  
or land  
Violence  
Grief and loss

## Presenting Mental State

For example:  
**Behaviour**  
Boisterous/shy  
**Orientation**  
Days to pension day  
Place  
**Arousal**  
Alert/drowsy  
**Appearance**  
Consistent with  
age/culture  
**Speech**  
Clear/slurred/nil  
**Mood**  
Agitated/depressed  
**Intellect**  
Dull/normal/bright  
**Memory**  
Lapses/inconsistencies  
**Perception**  
Hearing/sight  
Hallucinations/pain  
**Insight**  
**Further assessment**

## Cultural factors

For example:  
Gender difference between interviewer and client  
Eye contact or lack thereof  
Silence/long pauses  
Tendency to agree  
Trust/mistrust of mainstream services  
Homesickness for country/homelands  
Collectivist not individualist perspective  
May be considered rude to ask questions  
Entitlement to knowledge (e.g right to know/ask)  
Cultural transgressions (e.g. speaking name of deceased)  
Initiation into adulthood  
Connections – people, places, interests
